# Supplementary material
Source: PubMed Central journal article supplement (PMC2684469)
Supplement: jc.2008-1938_1.pdf [file jc.2008-1938_1.pdf]

**Table 1.** Hormonal and genotype results from all family members harboring *TSHR* gene mutations

| No.             | Gender | Age*<br>(Years) | TT <sub>4</sub><br>(µg/dl) | TT <sub>3</sub><br>(ng/dl) | TrT <sub>3</sub><br>(ng/dl) | FT <sub>4</sub> I | TSH<br>(mIU/l) | Genotype    |
|-----------------|--------|-----------------|----------------------------|----------------------------|-----------------------------|-------------------|----------------|-------------|
| IV-6            | F      | 21              | 5.9                        | 105                        | 13                          | <b>5.8</b>        | <b>45**</b>    | L653V/L653V |
| IV-9            | F      | 10              | 6.8                        | 157                        | 14                          | 7.4               | <b>37</b>      | L653V/L653V |
| IV-10           | F      | 6.3             | 7.9                        | 164                        | 16                          | 6.8               | <b>49</b>      | L653V/L653V |
| V-2             | M      | 4.3             | 7.8                        | 124                        | 22                          | 8.3               | <b>46</b>      | L653V/L653V |
| V-3             | M      | 3 wk            | 9                          | 171                        | 6***                        | 8.7               | <b>54</b>      | L653V/L653V |
| IV-4            | M      | 4               | 12                         | 193***                     | 27                          | 11                | <b>9.6</b>     | P68S/L653V  |
| IV-12           | M      | 11              | 7.7                        | 140                        | 16                          | 8.6               | <b>15</b>      | P68S/L653V  |
| IV-13           | F      | 8               | 9.8                        | 175                        | 24                          | 11                | <b>14</b>      | P68S/L653V  |
| IV-22           | M      | 6               | 7.4                        | 160                        | 20                          | 10                | <b>8.4</b>     | P68S/L653V  |
| III-2           | F      | 35              | 9.8                        | 138                        | 23                          | 9.3               | 2**            | P68S/WT     |
| III-3           | M      | 39              | 9.8                        | 172                        | 18                          | 9.3               | 2.6            | P68S/WT     |
| IV-11           | M      | 12              | 9.6                        | 197                        | 20                          | 9.6               | <b>6.6</b>     | P68S/WT     |
| III-13          | F      | 26              | 6.3                        | 111                        | <b>13</b>                   | 8.1               | 1.6            | P68S/WT     |
| III-4           | M      | 43              | 7.2                        | 138                        | 15                          | 7.7               | 2.7            | L653V/WT    |
| III-5           | F      | 43              | 7                          | 137                        | 15                          | 7.3               | 2.9            | L653V/WT    |
| VI-7            | M      | 20              | 6.3                        | 131                        | 15                          | 7.4               | 2.7            | L653V/WT    |
| VI-8            | F      | 14              | 10                         | 177                        | 26                          | 8.2               | 3.6            | L653V/WT    |
| III-1           | M      | 39              | 8.9                        | 162                        | 17                          | 9.1               | <b>6.3</b>     | L653V/WT    |
| IV-3            | F      | 7               | 9.4                        | 173                        | 20                          | 10                | <b>4.4</b>     | L653V/WT    |
| III-6           | F      | 33              | 8.7                        | 113                        | 19                          | 9.2               | <b>6.7**</b>   | L653V/WT    |
| III-7           | M      | 41              | 6.7                        | 117                        | 15                          | 8.1               | 2.8            | L653V/WT    |
| IV-15           | M      | 10              | 8.2                        | 170                        | 19                          | 8.7               | 2.5            | L653V/WT    |
| III-10          | M      | 34              | 6.5                        | 98                         | 15                          | 7.7               | <b>3.6</b>     | L653V/WT    |
| III-11          | M      | 27              | 7.3                        | 129                        | 17                          | 8.1               | <b>4.2</b>     | L653V/WT    |
| III-8           | F      | 40              | 8.4                        | 135                        | 18                          | 8.2               | 2              | L653V/WT    |
| IV-17           | F      | 9               | 8.5                        | 152                        | 22                          | 9.4               | <b>4.7</b>     | L653V/WT    |
| IV 20           | F      | 44              | 8.8                        | 153                        | 26                          | 9                 | <b>6.3**</b>   | L653V/WT    |
| III-9           | F      | 37              | 11.9                       | 178                        | 28                          | 6.3               | 3              | L653V/WT    |
| IV-23           | M      | 31              | 8.5                        | 149                        | 18                          | 8.1               | 2.6            | L653V/WT    |
| IV-24           | F      | 26              | 7.4                        | 94                         | 18                          | 7.7               | 2              | L653V/WT    |
| V-1             | F      | 5               | 8.7                        | 157                        | 20                          | 9.5               | 3              | L653V/WT    |
| III-12          | M      | 30              | 7.6                        | 100                        | 27                          | 9.5               | <b>5.1</b>     | L653V/WT    |
| IV-21           | M      | 8               | 9.3                        | 145                        | 18                          | 10                | 3.3            | L653V/WT    |
| Normal<br>range |        |                 | 5.0-11.6                   | 90-180                     | 14-30.                      | 6.0-10.5          | 0.4-3.6        |             |

\*At presentation

\*\*AITD (Positive TPO and TG antibodies).

\*\*\* Normal for age

Levels outside the normal ranges are marked in bold number
